# Supplementary material
Source: HighWire-hosted journal article supplement (https://gh.bmj.com/content/8/12/e012319)
Supplement: inline-supplementary-material-1 [file inline-supplementary-material-1.pdf]

Table S1: Full list of members of JPIAMR AMR-RDT Working Group during the study.

|     | Name Surname                   | Organisation name                                                             | Type                         | Country | LMIC/<br>HIC | Gender |
|-----|--------------------------------|-------------------------------------------------------------------------------|------------------------------|---------|--------------|--------|
| 1.  | Till T. Bachmann (coordinator) | University of Edinburgh                                                       | University/Research          | UK      | HIC          | M      |
| 2.  | Alex van Belkum                | BioMérieux, current BaseClear                                                 | Industry                     | FR      | HIC          | M      |
| 3.  | Alasdair MacGowan              | North Bristol NHS Trust                                                       | Public Health                | UK      | HIC          | M      |
| 4.  | Aman Russom                    | KTH Royal Institute of Technology                                             | University/Research          | SE      | HIC          | M      |
| 5.  | Andrew Shepherd                | GlobalDx (formerly Omega Diagnostics)                                         | Industry                     | UK      | HIC          | M      |
| 6.  | Ann Van den Bruel              | NIHR Diagnostic Evidence Cooperative                                          | Non-profit, NGO, Association | UK      | HIC          | F      |
| 7.  | Annika Eriksson                | HemoCue AB                                                                    | Industry                     | SE      | HIC          | F      |
| 8.  | Barbara Fallowfield            | British In Vitro Diagnostics Association (left)                               | Industry                     | UK      | HIC          | F      |
| 9.  | Cassandra Kelly-Cirino         | Foundation for Innovative New Diagnostics                                     | Non-profit, NGO, Association | CH      | HIC          | F      |
| 10. | Carla Deakin                   | NICE                                                                          | Non-profit, NGO, Association | UK      | HIC          | F      |
| 11. | Eiichi Tamiya                  | Osaka University                                                              | University/Research          | JP      | HIC          | M      |
| 12. | Francis Moussy                 | World Health Organization, <i>Observer</i>                                    | Non-profit, NGO, Association | CH      | HIC          | M      |
| 13. | Franck Molina                  | European Diagnostics Cluster Alliance                                         | Non-profit, NGO, Association | FR      | HIC          | M      |
| 14. | Frank Apostel                  | R-Biopharm                                                                    | Industry                     | DE      | HIC          | M      |
| 15. | Harald Peter                   | Fraunhofer IZI-BB                                                             | University/Research          | DE      | HIC          | M      |
| 16. | Gerd Lüdke                     | Curetis GmbH                                                                  | Industry                     | DE      | HIC          | M      |
| 17. | Guido Werner                   | Robert Koch Institute                                                         | University/Research          | DE      | HIC          | M      |
| 18. | Gunnar S. Simonsen             | University Hospital of North Norway and UiT – The Arctic University of Norway | University/Research          | NO      | HIC          | M      |
| 19. | Gyorgy Abel                    | Lahey Hospital, Harvard Medical School                                        | University/Research          | US      | HIC          | M      |
| 20. | Herman Goossens                | Antwerp University                                                            | University/Research          | BE      | HIC          | M      |
| 21. | Jacob Moran-Gilad              | Ben-Gurion University of the Negev                                            | University/Research          | IL      | HIC          | M      |
| 22. | James Fraser                   | Chipcare                                                                      | Industry                     | CA      | HIC          | M      |
| 23. | Jean François de Lavison       | Ahimsa Fund                                                                   | Non-profit, NGO, Association | FR      | HIC          | M      |
| 24. | John P. Hays                   | Erasmus University Medical Center Rotterdam                                   | University/Research          | NL      | HIC          | M      |
| 25. | John Rex                       | F2G, Ltd. (ex AstraZeneca)                                                    | Industry                     | US      | HIC          | M      |
| 26. | Jordi Vila                     | University of Barcelona, Hospital Clinic, ISGlobal                            | University/Research          | ES      | HIC          | M      |
| 27. | Karsten Becker                 | University Hospital Münster (current University Medicine Greifswald)          | University/Research          | DE      | HIC          | M      |

|     |                          |                                                                          |                              |       |      |   |
|-----|--------------------------|--------------------------------------------------------------------------|------------------------------|-------|------|---|
| 28. | Kate Templeton           | NHS Lothian                                                              | Public Health                | UK    | HIC  | F |
| 29. | Kirsten Miller-Duys      | Hyrax Biosciences                                                        | Industry                     | SA    | LMIC | F |
| 30. | Konstantinos Mitsakakis  | Hahn-Schickard & University of Freiburg                                  | University/Research          | DE    | HIC  | M |
| 31. | Manica Balasegeram       | GARDP/DNDI                                                               | Non-profit, NGO, Association | CH    | HIC  | M |
| 32. | Mark Woolhouse           | University of Edinburgh                                                  | University/Research          | UK    | HIC  | M |
| 33. | Neil Butler              | Spectromics                                                              | Industry                     | UK    | HIC  | M |
| 34. | Neil Woodford            | Public Health England                                                    | Public Health                | UK    | HIC  | M |
| 35. | Paul Savelkoul           | Maastricht University                                                    | University/Research          | NL    | HIC  | M |
| 36. | Petra Gastmeier          | Charite Belin, Infect Control 2020                                       | University/Research          | DE    | HIC  | F |
| 37. | Philippe Lagace-Wiens    | University of Manitoba (left)                                            | University/Research          | CA    | HIC  | M |
| 38. | Rangarajan Sampath       | Foundation for Innovative New Diagnostics (current Siemens Healthineers) | Non-profit, NGO, Association | CH    | HIC  | M |
| 39. | Ramanan Laxminarayan     | Center for Disease Dynamics, Economics & Policy                          | University/Research          | US/IN | LMIC | M |
| 40. | Rosanna Peeling          | London School of Hygiene & Tropical Medicine                             | University/Research          | UK    | HIC  | F |
| 41. | Saturnino Luz            | Usher Institute                                                          | University/Research          | UK    | HIC  | M |
| 42. | Sören Schubert           | Max von Pettenkofer Institute Munich                                     | University/Research          | DE    | HIC  | M |
| 43. | Stephan Harbarth         | University of Geneva                                                     | University/Research          | CH    | HIC  | M |
| 44. | Sue Hill                 | NHS England                                                              | Public Health                | UK    | HIC  | F |
| 45. | Tracy Merlin             | University of Adelaide                                                   | University/Research          | AU    | HIC  | F |
| 46. | Taslimarif Saiyed        | Centre for Cellular and Molecular Platforms                              | University/Research          | IN    | LMIC | M |
| 47. | Thomas Wichelhaus        | University Frankfurt; Paul Ehrlich Society                               | University/Research          | DE    | HIC  | M |
| 48. | Tjeerd van Staa          | Farr Institute; University of Manchester                                 | University/Research          | UK    | HIC  | M |
| 49. | Valentina Di Gregori     | San Pier Damiano Hospital GVM Care and Research                          | University/Research          | IT    | HIC  | F |
| 50. | Wouter van der Wijngaart | KTH Royal Institute of Technology                                        | University/Research          | SE    | HIC  | M |
| 51. | Wilfried von Eiff        | HHL Leipzig                                                              | University/Research          | DE    | HIC  | M |

Geographically the working group included 48/51 (94%) experts from High Income Countries (HICs): European Union (EU) and European Economic Area (EEA) 22/51 (43%); UK 14/51 (27%); Switzerland 5/51 (10%); USA 2/51 (4%); Canada 2/51 (4%); Australia 1/51 (2%); Israel 1/51 (2%); Japan 1/51 (2%), as well as 3/51 (6%) from Low- and Middle-Income Countries (LMICs): South Africa 1/51 (2%); India 2/51 (4%), and a more overall representation through members from FIND.

Gender-wise, the group consisted of 39/51 (76%) male and 12/51 (24%) female members.

The summary is given below.

| Participating Country                                       | Absolute number | Percent    |
|-------------------------------------------------------------|-----------------|------------|
| Israel                                                      | 1               | 2%         |
| Japan                                                       | 1               | 2%         |
| South Africa                                                | 1               | 2%         |
| Australia                                                   | 1               | 2%         |
| India                                                       | 2               | 4%         |
| Canada                                                      | 2               | 4%         |
| USA                                                         | 2               | 4%         |
| Switzerland                                                 | 5               | 10%        |
| UK                                                          | 14              | 27%        |
| <b>European Union (EU) and European Economic Area (EEA)</b> | <b>22</b>       | <b>43%</b> |
| Germany (DE)                                                | 10              | 20%        |
| Italy (IT)                                                  | 1               | 2%         |
| Belgium (BE)                                                | 1               | 2%         |
| Sweden (SE)                                                 | 3               | 6%         |
| The Netherlands (NL)                                        | 2               | 4%         |
| Spain (ES)                                                  | 1               | 2%         |
| Norway (NO)                                                 | 1               | 2%         |
| France (FR)                                                 | 3               | 6%         |

| <b>Participations from High Income Countries (HICs) and Low/Middle-Income Countries (LMICs)</b> | <b>Absolute number</b> | <b>Percent</b> |
|-------------------------------------------------------------------------------------------------|------------------------|----------------|
| HICs                                                                                            | 48                     | 94%            |
| LMICs                                                                                           | 3                      | 6%             |

| <b>Gender participations</b> | <b>Absolute number</b> | <b>Percent</b> |
|------------------------------|------------------------|----------------|
| Male                         | 39                     | 76%            |
| Female                       | 12                     | 24%            |
