# Supplementary material
Source: HighWire-hosted journal article supplement (https://gh.bmj.com/content/8/12/e012319)
Supplement: inline-supplementary-material-2 [file inline-supplementary-material-2.pdf]

Table S2: Essential Qualitative Information for AMR Diagnostic Test Target Product Profiles (TPP).

| Characteristic                            | Qualitative explanation                                                                                                                                                                       | Examples of External Influencing Factors                                                                                                                  | Influencing Characteristics (taken from column 1)                                                                                                                                                                                                     |
|-------------------------------------------|-----------------------------------------------------------------------------------------------------------------------------------------------------------------------------------------------|-----------------------------------------------------------------------------------------------------------------------------------------------------------|-------------------------------------------------------------------------------------------------------------------------------------------------------------------------------------------------------------------------------------------------------|
| <b>Category 'Intended Use'</b>            |                                                                                                                                                                                               |                                                                                                                                                           |                                                                                                                                                                                                                                                       |
| Target population                         | Patients presenting with symptoms indicating an infection. Patients needing monitoring or decision on management and treatment. Screening and surveillance cohorts                            | Age, gender                                                                                                                                               | Does the patient have an infection?<br>Are microorganisms present (if so, which ones)?<br>Are there Antimicrobial Resistance (AMR) determinants present?<br>Which antimicrobial drug(s) can be used?                                                  |
| Setting                                   | Home, community (e.g. care home, mobile/pop-up ambulatory units), primary care (e.g. general practitioners, doctors' office), pharmacies, emergency department, hospital, intensive care unit | Predominant touch points for target population, location of target population (geography, urban/rural etc.), healthcare system, availability of utilities | Target population, end user                                                                                                                                                                                                                           |
| End user (the person performing the test) | Lay person, community health worker, nurse, medical/laboratory technician, general practitioner, medical specialist, clinical scientist, pharmacist                                           | Guidelines defining user qualification                                                                                                                    | Setting, Does the patient have an infection?<br>Are microorganisms present (if so, which ones)?<br>Are there Antimicrobial Resistance (AMR) determinants present?<br>Which antimicrobial drug(s) can be used? test principle, test system, regulatory |
| <b>Category 'Diagnostic Question'</b>     |                                                                                                                                                                                               |                                                                                                                                                           |                                                                                                                                                                                                                                                       |
| Does the patient have an infection?       | Yes (acute, recurrent, relapsing, chronic)/no                                                                                                                                                 | Intended or available treatment or management option, scientific knowledge and evidence, disease indication, relative risk of                             | Setting,<br>Are microorganisms present (if so, which ones)?<br>Are there Antimicrobial Resistance (AMR) determinants present?                                                                                                                         |

|                                                                                    |                                                                                                                                                                                                                        |                                                                                                                                                                                                       |                                                                                              |
|------------------------------------------------------------------------------------|------------------------------------------------------------------------------------------------------------------------------------------------------------------------------------------------------------------------|-------------------------------------------------------------------------------------------------------------------------------------------------------------------------------------------------------|----------------------------------------------------------------------------------------------|
|                                                                                    |                                                                                                                                                                                                                        | morbidity/mortality, infectivity/transmission                                                                                                                                                         |                                                                                              |
| Are microorganisms present (if so, which ones)?                                    | Yes/no (pathogens/non-pathogens; Gram positive/negative bacteria; spore formers; mycobacteria; spirochaetes; mycoplasmas; viruses; fungi; parasites; phylogenetic classification e.g. species/strain/type)             | Intended or available treatment or management option, scientific knowledge and evidence, disease indication, relative risk of morbidity/mortality, infectivity/transmission, WHO prioritisation level | Setting, Does the patient have an infection?                                                 |
| Are there Antimicrobial Resistance (AMR) determinants present (if so, which ones)? | Yes/no (antibacterial-, antifungal-, antiviral-, antiparasitic-resistance; class; name of mechanism/gene; gene sequence)                                                                                               | Intended or available treatment or management option, scientific knowledge and evidence, disease indication, local/regional epidemiology of disease and antimicrobial resistance                      | Setting, Does the patient have an infection? Are microorganisms present (if so, which ones)? |
| Which antimicrobial drug(s) can be used?                                           | Sensitivity (Resistant, Sensitive, Sensitive to increased exposure (intermediate); e.g. Minimal Inhibitory Concentration (MIC)) to an individual or panel of antibacterial, antifungal, antiviral, antiparasitic drugs | Intended or available treatment or management option, scientific knowledge and evidence, disease indication, local/regional epidemiology of disease and antimicrobial resistance                      | Setting, Does the patient have an infection? Are microorganisms present (if so, which ones)? |
| <b>Category 'Test Description'</b>                                                 |                                                                                                                                                                                                                        |                                                                                                                                                                                                       |                                                                                              |
| Test principle                                                                     | Phenotype, genotype, molecular; detection through culture, optical, electrochemical, mass spectrometric, magnetic, mechanical, thermal, acoustic, piezoelectric methods                                                | Health economics                                                                                                                                                                                      | Setting, target analyte(s), time-to-result, analytical sensitivity, analytical specificity   |
| Test system                                                                        | Instrument (with or without disposable cartridge), instrument-free test/strip/cartridge, sampling device/consumable, additional reagents                                                                               | Assay complexity, stability of assay components                                                                                                                                                       | Setting, test principle, target specimen, sample quantity, operating conditions              |

|                                    |                                                                                                                                  |                                                                                                                  |                                                                                                                                           |
|------------------------------------|----------------------------------------------------------------------------------------------------------------------------------|------------------------------------------------------------------------------------------------------------------|-------------------------------------------------------------------------------------------------------------------------------------------|
| Additional third-party consumables | Allowed, not allowed                                                                                                             | Intellectual property rights, test tolerance towards non-original consumables, business model                    | Regulatory                                                                                                                                |
| Target analyte(s)                  | Cells, microorganisms, cell envelope components, vesicles, proteins, nucleic acids, lipids, carbohydrates, small molecules, ions | Scientific knowledge and evidence, intellectual property rights                                                  | Diagnostic question (all characteristics), clinical sensitivity, clinical specificity                                                     |
| Throughput <sup>1</sup>            | One - multiple test/time                                                                                                         | Prevalence/incidence of disease, business model, organisation of working time (shifts vs 24/7), assay complexity | Target population, setting, test principle, test system, instrument size, hands-on steps, time-to-result, retail price, bill of materials |
| Random access <sup>2</sup>         | Yes/No                                                                                                                           | Prevalence/incidence of disease, assay complexity, business model, organisation of working time (shifts vs 24/7) | Target population, setting, test principle, test system, instrument size, time-to-result, retail price                                    |
| Disposal                           | Disposable/reusable/recyclable/biodegradable materials, treatment for biohazard/non-biohazard, toxic/non-toxic waste             | Target markets, health economics, public opinion, sustainability of materials                                    | Setting, end user, regulatory, retail price, bill of materials                                                                            |
| Instrument size                    | Instrument free, wearable, handheld, portable, table top, free standing, large, high throughput, automated laboratory systems    | Health economics, automation, instrument stacking requirements                                                   | Setting, test principle, throughput, instrument weight, sample preparation needs, retail price, bill of materials                         |
| Instrument weight                  | Grams to many kilograms                                                                                                          | Target markets, health economics, automation, instrument stacking requirements                                   | Setting, test principle, throughput, instrument size, sample preparation needs, retail price, bill of materials                           |
| Power requirements                 | Mains, battery, solar, self-powered, human-powered, none                                                                         | Target markets, health economics, automation                                                                     | Setting, test principle, test system, throughput, instrument                                                                              |

<sup>1</sup> number of tests per unit of time

<sup>2</sup> capacity to add additional samples while others are still being processed

|                         |                                                                                                                                                                                                                                                              |                                                                                                                        |                                                                                                         |
|-------------------------|--------------------------------------------------------------------------------------------------------------------------------------------------------------------------------------------------------------------------------------------------------------|------------------------------------------------------------------------------------------------------------------------|---------------------------------------------------------------------------------------------------------|
|                         |                                                                                                                                                                                                                                                              |                                                                                                                        | connectivity, data display, sample preparation needs, operating conditions                              |
| Instrument connectivity | No/Yes (connection to hospital information system, electronic health record, epidemiological surveillance, cloud storage, remote access, instrument performance monitoring, data storage and archiving, type of connection (WiFi, Bluetooth, LAN, USB, ...)) | Target markets, availability of middleware, availability of data protection mechanisms, quality assurance requirements | Setting, end user, power requirements, data display, data input, data export, regulatory, retail price  |
| Result output           | Qualitative, quantitative, semi-quantitative                                                                                                                                                                                                                 | Health economics, assay complexity                                                                                     | Target population, setting, end user, diagnostic question (all characteristics), retail price           |
| Data display            | For instrument-free test/strip/cartridge: visual (colour, screen)<br>For instrument-based test: On-/Off-instrument (screen, printout), visual (numeric, textual, colour, graphical), auditory (speech, notification sounds)                                  | Target markets, accessibility (lighting conditions, background noise)                                                  | Setting, end user, throughput, power requirements, instrument connectivity, result output, retail price |
| Data input              | Patient ID, Lot/cartridge ID, operator ID, metadata (location, laboratory, date);<br>Manual entry (keypad, touchscreen), automated entry (bar code, RFID, ...)                                                                                               | Target markets, data protection and safety regulations                                                                 | Setting, end user, test system, throughput, instrument size, retail price                               |
| Data export             | Patient, test, and instrument data;<br>Manual registration, hardware/software interfaces;<br>Secure, encrypted, anonymised;<br>Real time, on demand                                                                                                          | Data storage requirements, data protection and safety regulations                                                      | Setting, end user, diagnostic question (all characteristics), throughput                                |
| Calibration             | No (calibration free)/Yes (Location (On site, remote), mode (self-calibrating, user, company technician), frequency (annual to daily, before each measurement), materials (reference standard/materials e.g. provided by QA/QC organisations))               | Business model, frequency of use                                                                                       | Setting, test principle, test system, target analyte(s), throughput, regulatory                         |

|                                                                                                              |                                                                                                                                                                                                                                      |                                                                                                                                                                         |                                                                                                                                                                     |
|--------------------------------------------------------------------------------------------------------------|--------------------------------------------------------------------------------------------------------------------------------------------------------------------------------------------------------------------------------------|-------------------------------------------------------------------------------------------------------------------------------------------------------------------------|---------------------------------------------------------------------------------------------------------------------------------------------------------------------|
| Maintenance                                                                                                  | Yes (frequency of maintenance, operator)/No                                                                                                                                                                                          | Frequency of use, assay complexity, automation                                                                                                                          | Setting, end user, test system, throughput, sample preparation needs, operating conditions                                                                          |
| Shipping/storage conditions (for instrument and disposable or instrument-free test/strip/cartridge/reagents) | Acceptable temperature range (e.g. cold chain requirements); Ability to withstand dusty conditions; Range for relative humidity/non-condensing humidity; Range for altitude                                                          | Instrument materials, stability of assay components, robustness of assay                                                                                                | Setting, test principle, test system, shelf life                                                                                                                    |
| Shelf life (for instrument and disposable or instrument-free test/strip/cartridge/reagents)                  | Range in months (at specified temperature/humidity)                                                                                                                                                                                  | Stability of assay components, business model                                                                                                                           | Setting, test system, shipping/storage conditions, regulatory                                                                                                       |
| Training requirements                                                                                        | Self-training (Instruction manual printed/online, training video), by qualified users, by company expert; duration of training (minutes, hours, days); recommended, mandatory (plus/minus access controlled)                         | Assay complexity                                                                                                                                                        | Setting, end user, test system, result output, data display, data input, data export, calibration, specimen/sample collection, hands on steps, controls, regulatory |
| <b>Category 'Assay Protocol'</b>                                                                             |                                                                                                                                                                                                                                      |                                                                                                                                                                         |                                                                                                                                                                     |
| Target specimen                                                                                              | Hair, cerebrospinal fluid, sweat, tears, saliva, ear wax, tissue, blood (plasma, serum), lymph, interstitial fluid, sputum, pus, bronchoalveolar lavage, nails, faeces, semen, urine, specimen on swabs, nasal washings, exhaled air | Disease indication, target analyte(s) and location/abundance in/on the body, biological risk, requirement for ease of specimen collection, invasiveness, and processing | Setting, diagnostic question (all characteristics)                                                                                                                  |
| Specimen/sample collection                                                                                   | Venipuncture, finger prick, salivation, stool collection, gargling, urination, swab/sputum collection, lumbar puncture, intubation, etc.                                                                                             | Disease indication, target analyte(s) and location/abundance in/on the body, biological risk, requirement for ease of specimen collection, invasiveness, and processing | Setting, end user, test system, target analyte(s), target specimen, sample quantity                                                                                 |
| Sample quantity                                                                                              | $\mu\text{L}$ - mL, mg, g, number of solid pieces/fragments etc.                                                                                                                                                                     | Disease indication, target analyte(s) and location/abundance in/on the                                                                                                  | Test principle, test system, target analyte(s), analytical sensitivity                                                                                              |

|                                                                                                     |                                                                                                                                                                           |                                                                                                          |                                                                                                                                        |
|-----------------------------------------------------------------------------------------------------|---------------------------------------------------------------------------------------------------------------------------------------------------------------------------|----------------------------------------------------------------------------------------------------------|----------------------------------------------------------------------------------------------------------------------------------------|
|                                                                                                     |                                                                                                                                                                           | body, biological risk, requirement for ease of specimen collection, invasiveness, and processing         |                                                                                                                                        |
| Sample preparation needs                                                                            | Yes (homogenisation, liquefying, separation, extraction, purification, stabilisation, dilution) / No                                                                      | Assay complexity                                                                                         | Setting, end user, test principle, test system, throughput, power requirements, target specimen, retail price                          |
| Hands-on steps (from the start of sample processing to result)                                      | Refers to the number of steps from the start of sample processing                                                                                                         | Competitor performance, assay complexity, invasiveness, and processing                                   | Setting, end user, test principle, test system, throughput, calibration, sample preparation needs, controls, retail price              |
| Hands-on-time (from the start of sample processing to result)                                       | Seconds, minutes, hours                                                                                                                                                   | Competitor performance, assay complexity                                                                 | Setting, end user, test system, throughput, sample preparation needs, retail price                                                     |
| Time-to-result (TTR) (from the start of sample processing to result)                                | Minutes, hours                                                                                                                                                            | Competitor performance, assay complexity, health economics                                               | Target population, setting, diagnostic question (all characteristics), test principle, throughput, hands-on-time                       |
| Controls                                                                                            | Yes (internal process, positive, negative controls) / No                                                                                                                  | Assay complexity, stability of assay components                                                          | Test principle, test system, regulatory                                                                                                |
| Operating conditions                                                                                | Temperature range; Range for relative humidity, non-condensing humidity; Compatibility with dusty conditions; Resistance to electromagnetic/mechanical/light interference | Stability of assay components, robustness of assay                                                       | Setting, test principle, test system                                                                                                   |
| <b>Category 'Performance'</b>                                                                       |                                                                                                                                                                           |                                                                                                          |                                                                                                                                        |
| Analytical sensitivity (Limit of detection (LOD) of the specific target analyte - disease specific) | Given as number/mass of molecules/cells per test/unit volume                                                                                                              | Competitor performance, health economics, relative risk of morbidity/mortality, infectivity/transmission | Setting, diagnostic question (all characteristics), target analyte(s), target specimen, clinical sensitivity, regulatory, retail price |
| Analytical specificity (Detection of the specific target analyte(s))                                | Given as a percentage or statistical value                                                                                                                                | Existence and/or presence of similar target analyte(s),                                                  | Setting, diagnostic question (all characteristics), target analyte(s),                                                                 |

|                                                                                                                                                                            |                                                                                                   |                                                                                                                                                                                         |                                                                 |
|----------------------------------------------------------------------------------------------------------------------------------------------------------------------------|---------------------------------------------------------------------------------------------------|-----------------------------------------------------------------------------------------------------------------------------------------------------------------------------------------|-----------------------------------------------------------------|
| without cross reacting with non-target analyte(s) of the same type)                                                                                                        |                                                                                                   | competitor performance, health economics                                                                                                                                                | target specimen, clinical specificity, regulatory, retail price |
| Clinical sensitivity (Correct identification of a specific disease state)                                                                                                  | Given as a percentage range or statistical value compared to an accepted (named) reference method | Threat level, competitor performance, health economics, current gold standard, relative risk of morbidity/mortality, infectivity/transmission                                           | Setting, diagnostic question (all characteristics), regulatory  |
| Clinical specificity (Correct identification of those who do not have a specific disease state)                                                                            | Given as a percentage range or statistical value compared to an accepted (named) reference method | Threat level, competitor performance, health economics, current gold standard, relative risk of morbidity/mortality, infectivity/transmission                                           | Setting, diagnostic question (all characteristics), regulatory  |
| Positive predictive value (PPV) (The proportion of subjects with a positive test result who truly have the specific disease, biomarker, mutation etc., of interest)        | Given as a percentage range or statistical value compared to an accepted (named) reference method | Threat level, competitor performance, health economics, current gold standard, relative risk of morbidity/mortality, infectivity/transmission, disease prevalence, pre-test probability | Setting, diagnostic question (all characteristics), regulatory  |
| Negative predictive value (NPV) (The proportion of subjects with a negative test result who truly do not have the specific disease, biomarker, mutation etc., of interest) | Given as a percentage range or statistical value compared to an accepted (named) reference method | Threat level, competitor performance, health economics, current gold standard, relative risk of morbidity/mortality, infectivity/transmission, disease prevalence, pre-test probability | Setting, diagnostic question (all characteristics), regulatory  |

|                                                                                                                     |                                                                                                                                    |                                                                                              |                                                                                                                                                                                                                                                                                                                          |
|---------------------------------------------------------------------------------------------------------------------|------------------------------------------------------------------------------------------------------------------------------------|----------------------------------------------------------------------------------------------|--------------------------------------------------------------------------------------------------------------------------------------------------------------------------------------------------------------------------------------------------------------------------------------------------------------------------|
| Reproducibility (The ability of a test to produce the same result after multiple testing under the same conditions) | Quantitative Coefficient of Variation (CV) in inter/intra batch assessment                                                         | Threat level, relative risk of morbidity/mortality, competitor performance, health economics | Setting, end user, diagnostic question (all characteristics), regulatory                                                                                                                                                                                                                                                 |
| <b>Category 'Commercial'</b>                                                                                        |                                                                                                                                    |                                                                                              |                                                                                                                                                                                                                                                                                                                          |
| Regulatory                                                                                                          | GMP compliant, certified to international standards, e.g. ISO 13485:2016, by regulatory authorities, e.g. CE-IVD, FDA, NMPA, CDSCO | Business model, target market                                                                | Setting, end user, diagnostic question (all characteristics), test principle, test system, target analyte(s), target specimen                                                                                                                                                                                            |
| Retail price                                                                                                        | Range of (named) currency per test; 0 (reagent rental model) or range of (named) currency per instrument                           | Development costs, business model, target market, and other commercial considerations        | Target population, setting, end user, test principle, test system, additional third-party consumables, throughput, random access, instrument size, power requirements, instrument connectivity, result output, data display, shelf life (of disposable/instrument-free test/strip/cartridge/reagents), bill of materials |
| Bill of materials (BOM, sales BOM)                                                                                  | Range of (named) currency per test; range of (named) currency per instrument                                                       | Reagents, manufacturing volume                                                               | Test principle, test system, additional third-party consumables, throughput, instrument size, power requirements, instrument connectivity, result output, data display, shelf life (of disposable/instrument-free test/strip/cartridge/reagents), analytical sensitivity, analytical specificity                         |
