# Supplementary material
Source: HighWire-hosted journal article supplement (https://gh.bmj.com/content/8/12/e012319)
Supplement: inline-supplementary-material-3 [file inline-supplementary-material-3.pdf]

Table S3: Interactions between characteristics and sum of interactions per characteristic and per category.

| Categories of characteristics | Characteristics (taken from column 1 of Supplemental Table S2) | Influencing Characteristics (taken from column 4 of Supplemental Table S2) | Categories of Influencing Characteristics | Presence of an interaction between two characteristics ('1' means 'yes') | Sum of interactions per characteristic | Sum of interactions per category |
|-------------------------------|----------------------------------------------------------------|----------------------------------------------------------------------------|-------------------------------------------|--------------------------------------------------------------------------|----------------------------------------|----------------------------------|
| Intended Use                  | Target population                                              | Does the patient have an infection?                                        | Diagnostic Question                       | 1                                                                        | 4                                      | 14                               |
| Intended Use                  | Target population                                              | Are microorganisms present?                                                | Diagnostic Question                       | 1                                                                        |                                        |                                  |
| Intended Use                  | Target population                                              | Are there AMR determinants present?                                        | Diagnostic Question                       | 1                                                                        |                                        |                                  |
| Intended Use                  | Target population                                              | Which antimicrobial drug(s) can be used?                                   | Diagnostic Question                       | 1                                                                        |                                        |                                  |
| Intended Use                  | Setting                                                        | Target population                                                          | Intended Use                              | 1                                                                        | 2                                      |                                  |
| Intended Use                  | Setting                                                        | End user                                                                   | Intended Use                              | 1                                                                        |                                        |                                  |
| Intended Use                  | End user                                                       | Setting                                                                    | Intended Use                              | 1                                                                        | 8                                      |                                  |
| Intended Use                  | End user                                                       | Does the patient have an infection?                                        | Diagnostic Question                       | 1                                                                        |                                        |                                  |
| Intended Use                  | End user                                                       | Are microorganisms present?                                                | Diagnostic Question                       | 1                                                                        |                                        |                                  |
| Intended Use                  | End user                                                       | Are there AMR determinants present?                                        | Diagnostic Question                       | 1                                                                        |                                        |                                  |
| Intended Use                  | End user                                                       | Which antimicrobial drug(s) can be used?                                   | Diagnostic Question                       | 1                                                                        |                                        |                                  |
| Intended Use                  | End user                                                       | Test principle                                                             | Test Description                          | 1                                                                        |                                        |                                  |
| Intended Use                  | End user                                                       | Test system                                                                | Test Description                          | 1                                                                        |                                        |                                  |
| Intended Use                  | End user                                                       | Regulatory                                                                 | Commercial                                | 1                                                                        |                                        |                                  |
| Diagnostic Question           | Does the patient have an infection?                            | Setting                                                                    | Intended Use                              | 1                                                                        | 3                                      | 11                               |
| Diagnostic Question           | Does the patient have an infection?                            | Are microorganisms present?                                                | Diagnostic Question                       | 1                                                                        |                                        |                                  |
| Diagnostic Question           | Does the patient have an infection?                            | Are there AMR determinants present?                                        | Diagnostic Question                       | 1                                                                        |                                        |                                  |
| Diagnostic Question           | Are microorganisms present?                                    | Setting                                                                    | Intended Use                              | 1                                                                        | 2                                      |                                  |
| Diagnostic Question           | Are microorganisms present?                                    | Does the patient have an infection?                                        | Diagnostic Question                       | 1                                                                        |                                        |                                  |

|                     |                                          |                                          |                     |   |   |     |
|---------------------|------------------------------------------|------------------------------------------|---------------------|---|---|-----|
| Diagnostic Question | Are there AMR determinants present?      | Setting                                  | Intended Use        | 1 | 3 |     |
| Diagnostic Question | Are there AMR determinants present?      | Does the patient have an infection?      | Diagnostic Question | 1 |   |     |
| Diagnostic Question | Are there AMR determinants present?      | Are microorganisms present?              | Diagnostic Question | 1 |   |     |
| Diagnostic Question | Which antimicrobial drug(s) can be used? | Setting                                  | Intended Use        | 1 | 3 |     |
| Diagnostic Question | Which antimicrobial drug(s) can be used? | Does the patient have an infection?      | Diagnostic Question | 1 |   |     |
| Diagnostic Question | Which antimicrobial drug(s) can be used? | Are microorganisms present?              | Diagnostic Question | 1 |   |     |
| Test Description    | Test principle                           | Setting                                  | Intended Use        | 1 | 5 | 128 |
| Test Description    | Test principle                           | Target analyte(s)                        | Test Description    | 1 |   |     |
| Test Description    | Test principle                           | Time-to-result                           | Assay Protocol      | 1 |   |     |
| Test Description    | Test principle                           | Analytical sensitivity                   | Performance         | 1 |   |     |
| Test Description    | Test principle                           | Analytical specificity                   | Performance         | 1 |   |     |
| Test Description    | Test system                              | Setting                                  | Intended Use        | 1 | 5 |     |
| Test Description    | Test system                              | Test principle                           | Test Description    | 1 |   |     |
| Test Description    | Test system                              | Target specimen                          | Assay Protocol      | 1 |   |     |
| Test Description    | Test system                              | Sample quantity                          | Assay Protocol      | 1 |   |     |
| Test Description    | Test system                              | Operating conditions                     | Assay Protocol      | 1 |   |     |
| Test Description    | Additional third-party consumables       | Regulatory                               | Commercial          | 1 | 1 |     |
| Test Description    | Target analyte(s)                        | Does the patient have an infection?      | Diagnostic Question | 1 | 6 |     |
| Test Description    | Target analyte(s)                        | Are microorganisms present?              | Diagnostic Question | 1 |   |     |
| Test Description    | Target analyte(s)                        | Are there AMR determinants present?      | Diagnostic Question | 1 |   |     |
| Test Description    | Target analyte(s)                        | Which antimicrobial drug(s) can be used? | Diagnostic Question | 1 |   |     |
| Test Description    | Target analyte(s)                        | Clinical sensitivity                     | Performance         | 1 |   |     |

|                  |                   |                          |                  |   |   |  |
|------------------|-------------------|--------------------------|------------------|---|---|--|
| Test Description | Target analyte(s) | Clinical specificity     | Performance      | 1 |   |  |
| Test Description | Throughput        | Target population        | Intended Use     | 1 | 9 |  |
| Test Description | Throughput        | Setting                  | Intended Use     | 1 |   |  |
| Test Description | Throughput        | Test principle           | Test Description | 1 |   |  |
| Test Description | Throughput        | Test system              | Test Description | 1 |   |  |
| Test Description | Throughput        | Instrument size          | Test Description | 1 |   |  |
| Test Description | Throughput        | Hands-on steps           | Assay Protocol   | 1 |   |  |
| Test Description | Throughput        | Time-to-result           | Assay Protocol   | 1 |   |  |
| Test Description | Throughput        | Retail price             | Commercial       | 1 |   |  |
| Test Description | Throughput        | Bill of materials        | Commercial       | 1 |   |  |
| Test Description | Random access     | Target population        | Intended Use     | 1 | 7 |  |
| Test Description | Random access     | Setting                  | Intended Use     | 1 |   |  |
| Test Description | Random access     | Test principle           | Test Description | 1 |   |  |
| Test Description | Random access     | Test system              | Test Description | 1 |   |  |
| Test Description | Random access     | Instrument size          | Test Description | 1 |   |  |
| Test Description | Random access     | Time-to-result           | Assay Protocol   | 1 |   |  |
| Test Description | Random access     | Retail price             | Commercial       | 1 |   |  |
| Test Description | Disposal          | Setting                  | Intended Use     | 1 | 5 |  |
| Test Description | Disposal          | End user                 | Intended Use     | 1 |   |  |
| Test Description | Disposal          | Regulatory               | Commercial       | 1 |   |  |
| Test Description | Disposal          | Retail price             | Commercial       | 1 |   |  |
| Test Description | Disposal          | Bill of materials        | Commercial       | 1 |   |  |
| Test Description | Instrument size   | Setting                  | Intended Use     | 1 | 7 |  |
| Test Description | Instrument size   | Test principle           | Test Description | 1 |   |  |
| Test Description | Instrument size   | Throughput               | Test Description | 1 |   |  |
| Test Description | Instrument size   | Instrument weight        | Test Description | 1 |   |  |
| Test Description | Instrument size   | Sample preparation needs | Assay Protocol   | 1 |   |  |
| Test Description | Instrument size   | Retail price             | Commercial       | 1 |   |  |
| Test Description | Instrument size   | Bill of materials        | Commercial       | 1 |   |  |
| Test Description | Instrument weight | Setting                  | Intended Use     | 1 | 7 |  |
| Test Description | Instrument weight | Test principle           | Test Description | 1 |   |  |
| Test Description | Instrument weight | Throughput               | Test Description | 1 |   |  |
| Test Description | Instrument weight | Instrument size          | Test Description | 1 |   |  |
| Test Description | Instrument weight | Sample preparation needs | Assay Protocol   | 1 |   |  |

|                  |                         |                                     |                     |   |   |  |
|------------------|-------------------------|-------------------------------------|---------------------|---|---|--|
| Test Description | Instrument weight       | Retail price                        | Commercial          | 1 |   |  |
| Test Description | Instrument weight       | Bill of materials                   | Commercial          | 1 |   |  |
| Test Description | Power requirements      | Setting                             | Intended Use        | 1 | 8 |  |
| Test Description | Power requirements      | Test principle                      | Test Description    | 1 |   |  |
| Test Description | Power requirements      | Test system                         | Test Description    | 1 |   |  |
| Test Description | Power requirements      | Throughput                          | Test Description    | 1 |   |  |
| Test Description | Power requirements      | Instrument connectivity             | Test Description    | 1 |   |  |
| Test Description | Power requirements      | Data display                        | Test Description    | 1 |   |  |
| Test Description | Power requirements      | Sample preparation needs            | Assay Protocol      | 1 |   |  |
| Test Description | Power requirements      | Operating conditions                | Assay Protocol      | 1 |   |  |
| Test Description | Instrument connectivity | Setting                             | Intended Use        | 1 | 8 |  |
| Test Description | Instrument connectivity | End user                            | Intended Use        | 1 |   |  |
| Test Description | Instrument connectivity | Power requirements                  | Test Description    | 1 |   |  |
| Test Description | Instrument connectivity | Data display                        | Test Description    | 1 |   |  |
| Test Description | Instrument connectivity | Data input                          | Test Description    | 1 |   |  |
| Test Description | Instrument connectivity | Data export                         | Test Description    | 1 |   |  |
| Test Description | Instrument connectivity | Regulatory                          | Commercial          | 1 |   |  |
| Test Description | Instrument connectivity | Retail price                        | Commercial          | 1 |   |  |
| Test Description | Result output           | Target population                   | Intended Use        | 1 | 8 |  |
| Test Description | Result output           | Setting                             | Intended Use        | 1 |   |  |
| Test Description | Result output           | End user                            | Intended Use        | 1 |   |  |
| Test Description | Result output           | Does the patient have an infection? | Diagnostic Question | 1 |   |  |
| Test Description | Result output           | Are microorganisms present?         | Diagnostic Question | 1 |   |  |
| Test Description | Result output           | Are there AMR determinants present? | Diagnostic Question | 1 |   |  |

|                  |               |                                          |                     |   |   |  |
|------------------|---------------|------------------------------------------|---------------------|---|---|--|
| Test Description | Result output | Which antimicrobial drug(s) can be used? | Diagnostic Question | 1 |   |  |
| Test Description | Result output | Retail price                             | Commercial          | 1 |   |  |
| Test Description | Data display  | Setting                                  | Intended Use        | 1 | 7 |  |
| Test Description | Data display  | End user                                 | Intended Use        | 1 |   |  |
| Test Description | Data display  | Throughput                               | Test Description    | 1 |   |  |
| Test Description | Data display  | Power requirements                       | Test Description    | 1 |   |  |
| Test Description | Data display  | Instrument connectivity                  | Test Description    | 1 |   |  |
| Test Description | Data display  | Result output                            | Test Description    | 1 |   |  |
| Test Description | Data display  | Retail price                             | Commercial          | 1 |   |  |
| Test Description | Data input    | Setting                                  | Intended Use        | 1 | 6 |  |
| Test Description | Data input    | End user                                 | Intended Use        | 1 |   |  |
| Test Description | Data input    | Test system                              | Test Description    | 1 |   |  |
| Test Description | Data input    | Throughput                               | Test Description    | 1 |   |  |
| Test Description | Data input    | Instrument size                          | Test Description    | 1 |   |  |
| Test Description | Data input    | Retail price                             | Commercial          | 1 |   |  |
| Test Description | Data export   | Setting                                  | Intended Use        | 1 | 7 |  |
| Test Description | Data export   | End user                                 | Intended Use        | 1 |   |  |
| Test Description | Data export   | Does the patient have an infection?      | Diagnostic Question | 1 |   |  |
| Test Description | Data export   | Are microorganisms present?              | Diagnostic Question | 1 |   |  |
| Test Description | Data export   | Are there AMR determinants present?      | Diagnostic Question | 1 |   |  |
| Test Description | Data export   | Which antimicrobial drug(s) can be used? | Diagnostic Question | 1 |   |  |
| Test Description | Data export   | Throughput                               | Test Description    | 1 |   |  |
| Test Description | Calibration   | Setting                                  | Intended Use        | 1 | 6 |  |
| Test Description | Calibration   | Test principle                           | Test Description    | 1 |   |  |
| Test Description | Calibration   | Test system                              | Test Description    | 1 |   |  |
| Test Description | Calibration   | Target analyte(s)                        | Test Description    | 1 |   |  |
| Test Description | Calibration   | Throughput                               | Test Description    | 1 |   |  |
| Test Description | Calibration   | Regulatory                               | Commercial          | 1 |   |  |
| Test Description | Maintenance   | Setting                                  | Intended Use        | 1 | 6 |  |
| Test Description | Maintenance   | End user                                 | Intended Use        | 1 |   |  |

|                  |                             |                             |                  |   |    |  |
|------------------|-----------------------------|-----------------------------|------------------|---|----|--|
| Test Description | Maintenance                 | Test system                 | Test Description | 1 |    |  |
| Test Description | Maintenance                 | Throughput                  | Test Description | 1 |    |  |
| Test Description | Maintenance                 | Sample preparation needs    | Assay Protocol   | 1 |    |  |
| Test Description | Maintenance                 | Operating conditions        | Assay Protocol   | 1 |    |  |
| Test Description | Shipping/storage conditions | Setting                     | Intended Use     | 1 | 4  |  |
| Test Description | Shipping/storage conditions | Test principle              | Test Description | 1 |    |  |
| Test Description | Shipping/storage conditions | Test system                 | Test Description | 1 |    |  |
| Test Description | Shipping/storage conditions | Shelf life                  | Test Description | 1 |    |  |
| Test Description | Shelf life                  | Setting                     | Intended Use     | 1 | 4  |  |
| Test Description | Shelf life                  | Test system                 | Test Description | 1 |    |  |
| Test Description | Shelf life                  | Shipping/storage conditions | Test Description | 1 |    |  |
| Test Description | Shelf life                  | Regulatory                  | Commercial       | 1 |    |  |
| Test Description | Training requirements       | Setting                     | Intended Use     | 1 | 12 |  |
| Test Description | Training requirements       | End user                    | Intended Use     | 1 |    |  |
| Test Description | Training requirements       | Test system                 | Test Description | 1 |    |  |
| Test Description | Training requirements       | Result output               | Test Description | 1 |    |  |
| Test Description | Training requirements       | Data display                | Test Description | 1 |    |  |
| Test Description | Training requirements       | Data input                  | Test Description | 1 |    |  |
| Test Description | Training requirements       | Data export                 | Test Description | 1 |    |  |
| Test Description | Training requirements       | Calibration                 | Test Description | 1 |    |  |
| Test Description | Training requirements       | Specimen/sample collection  | Assay Protocol   | 1 |    |  |

|                  |                            |                                          |                     |   |   |    |
|------------------|----------------------------|------------------------------------------|---------------------|---|---|----|
| Test Description | Training requirements      | Hands-on steps                           | Assay Protocol      | 1 |   |    |
| Test Description | Training requirements      | Controls                                 | Assay Protocol      | 1 |   |    |
| Test Description | Training requirements      | Regulatory                               | Commercial          | 1 |   |    |
| Assay Protocol   | Target specimen            | Setting                                  | Intended Use        | 1 | 5 | 53 |
| Assay Protocol   | Target specimen            | Does the patient have an infection?      | Diagnostic Question | 1 |   |    |
| Assay Protocol   | Target specimen            | Are microorganisms present?              | Diagnostic Question | 1 |   |    |
| Assay Protocol   | Target specimen            | Are there AMR determinants present?      | Diagnostic Question | 1 |   |    |
| Assay Protocol   | Target specimen            | Which antimicrobial drug(s) can be used? | Diagnostic Question | 1 |   |    |
| Assay Protocol   | Specimen/sample collection | Setting                                  | Intended Use        | 1 | 6 |    |
| Assay Protocol   | Specimen/sample collection | End user                                 | Intended Use        | 1 |   |    |
| Assay Protocol   | Specimen/sample collection | Test system                              | Test Description    | 1 |   |    |
| Assay Protocol   | Specimen/sample collection | Target analyte(s)                        | Test Description    | 1 |   |    |
| Assay Protocol   | Specimen/sample collection | Target specimen                          | Assay Protocol      | 1 |   |    |
| Assay Protocol   | Specimen/sample collection | Sample quantity                          | Assay Protocol      | 1 |   |    |
| Assay Protocol   | Sample quantity            | Test principle                           | Test Description    | 1 | 4 |    |
| Assay Protocol   | Sample quantity            | Test system                              | Test Description    | 1 |   |    |
| Assay Protocol   | Sample quantity            | Target analyte(s)                        | Test Description    | 1 |   |    |
| Assay Protocol   | Sample quantity            | Analytical sensitivity                   | Performance         | 1 |   |    |
| Assay Protocol   | Sample preparation needs   | Setting                                  | Intended Use        | 1 | 8 |    |
| Assay Protocol   | Sample preparation needs   | End user                                 | Intended Use        | 1 |   |    |

|                |                          |                                     |                     |   |   |  |
|----------------|--------------------------|-------------------------------------|---------------------|---|---|--|
| Assay Protocol | Sample preparation needs | Test principle                      | Test Description    | 1 |   |  |
| Assay Protocol | Sample preparation needs | Test system                         | Test Description    | 1 |   |  |
| Assay Protocol | Sample preparation needs | Throughput                          | Test Description    | 1 |   |  |
| Assay Protocol | Sample preparation needs | Power requirements                  | Test Description    | 1 |   |  |
| Assay Protocol | Sample preparation needs | Target specimen                     | Assay Protocol      | 1 |   |  |
| Assay Protocol | Sample preparation needs | Retail price                        | Commercial          | 1 |   |  |
| Assay Protocol | Hands-on steps           | Setting                             | Intended Use        | 1 | 9 |  |
| Assay Protocol | Hands-on steps           | End user                            | Intended Use        | 1 |   |  |
| Assay Protocol | Hands-on steps           | Test principle                      | Test Description    | 1 |   |  |
| Assay Protocol | Hands-on steps           | Test system                         | Test Description    | 1 |   |  |
| Assay Protocol | Hands-on steps           | Throughput                          | Test Description    | 1 |   |  |
| Assay Protocol | Hands-on steps           | Calibration                         | Test Description    | 1 |   |  |
| Assay Protocol | Hands-on steps           | Sample preparation needs            | Assay Protocol      | 1 |   |  |
| Assay Protocol | Hands-on steps           | Controls                            | Assay Protocol      | 1 |   |  |
| Assay Protocol | Hands-on steps           | Retail price                        | Commercial          | 1 |   |  |
| Assay Protocol | Hands-on-time            | Setting                             | Intended Use        | 1 | 6 |  |
| Assay Protocol | Hands-on-time            | End user                            | Intended Use        | 1 |   |  |
| Assay Protocol | Hands-on-time            | Test system                         | Test Description    | 1 |   |  |
| Assay Protocol | Hands-on-time            | Throughput                          | Test Description    | 1 |   |  |
| Assay Protocol | Hands-on-time            | Sample preparation needs            | Assay Protocol      | 1 |   |  |
| Assay Protocol | Hands-on-time            | Retail price                        | Commercial          | 1 |   |  |
| Assay Protocol | Time-to-result           | Target population                   | Intended Use        | 1 | 9 |  |
| Assay Protocol | Time-to-result           | Setting                             | Intended Use        | 1 |   |  |
| Assay Protocol | Time-to-result           | Does the patient have an infection? | Diagnostic Question | 1 |   |  |
| Assay Protocol | Time-to-result           | Are microorganisms present?         | Diagnostic Question | 1 |   |  |
| Assay Protocol | Time-to-result           | Are there AMR determinants present? | Diagnostic Question | 1 |   |  |

|                |                        |                                          |                     |   |    |    |
|----------------|------------------------|------------------------------------------|---------------------|---|----|----|
| Assay Protocol | Time-to-result         | Which antimicrobial drug(s) can be used? | Diagnostic Question | 1 |    |    |
| Assay Protocol | Time-to-result         | Test principle                           | Test Description    | 1 |    |    |
| Assay Protocol | Time-to-result         | Throughput                               | Test Description    | 1 |    |    |
| Assay Protocol | Time-to-result         | Hands-on-time                            | Assay Protocol      | 1 |    |    |
| Assay Protocol | Controls               | Test principle                           | Test Description    | 1 | 3  |    |
| Assay Protocol | Controls               | Test system                              | Test Description    | 1 |    |    |
| Assay Protocol | Controls               | Regulatory                               | Commercial          | 1 |    |    |
| Assay Protocol | Operating conditions   | Setting                                  | Intended Use        | 1 | 3  |    |
| Assay Protocol | Operating conditions   | Test principle                           | Test Description    | 1 |    |    |
| Assay Protocol | Operating conditions   | Test system                              | Test Description    | 1 |    |    |
| Performance    | Analytical sensitivity | Setting                                  | Intended Use        | 1 | 10 | 51 |
| Performance    | Analytical sensitivity | Does the patient have an infection?      | Diagnostic Question | 1 |    |    |
| Performance    | Analytical sensitivity | Are microorganisms present?              | Diagnostic Question | 1 |    |    |
| Performance    | Analytical sensitivity | Are there AMR determinants present?      | Diagnostic Question | 1 |    |    |
| Performance    | Analytical sensitivity | Which antimicrobial drug(s) can be used? | Diagnostic Question | 1 |    |    |
| Performance    | Analytical sensitivity | Target analyte(s)                        | Test Description    | 1 |    |    |
| Performance    | Analytical sensitivity | Target specimen                          | Assay Protocol      | 1 |    |    |
| Performance    | Analytical sensitivity | Clinical sensitivity                     | Performance         | 1 |    |    |
| Performance    | Analytical sensitivity | Regulatory                               | Commercial          | 1 |    |    |
| Performance    | Analytical sensitivity | Retail price                             | Commercial          | 1 |    |    |
| Performance    | Analytical specificity | Setting                                  | Intended Use        | 1 | 10 |    |
| Performance    | Analytical specificity | Does the patient have an infection?      | Diagnostic Question | 1 |    |    |
| Performance    | Analytical specificity | Are microorganisms present?              | Diagnostic Question | 1 |    |    |
| Performance    | Analytical specificity | Are there AMR determinants present?      | Diagnostic Question | 1 |    |    |

|             |                           |                                          |                     |   |   |  |
|-------------|---------------------------|------------------------------------------|---------------------|---|---|--|
| Performance | Analytical specificity    | Which antimicrobial drug(s) can be used? | Diagnostic Question | 1 |   |  |
| Performance | Analytical specificity    | Target analyte(s)                        | Test Description    | 1 |   |  |
| Performance | Analytical specificity    | Target specimen                          | Assay Protocol      | 1 |   |  |
| Performance | Analytical specificity    | Clinical specificity                     | Performance         | 1 |   |  |
| Performance | Analytical specificity    | Regulatory                               | Commercial          | 1 |   |  |
| Performance | Analytical specificity    | Retail price                             | Commercial          | 1 |   |  |
| Performance | Clinical sensitivity      | Setting                                  | Intended Use        | 1 | 6 |  |
| Performance | Clinical sensitivity      | Does the patient have an infection?      | Diagnostic Question | 1 |   |  |
| Performance | Clinical sensitivity      | Are microorganisms present?              | Diagnostic Question | 1 |   |  |
| Performance | Clinical sensitivity      | Are there AMR determinants present?      | Diagnostic Question | 1 |   |  |
| Performance | Clinical sensitivity      | Which antimicrobial drug(s) can be used? | Diagnostic Question | 1 |   |  |
| Performance | Clinical sensitivity      | Regulatory                               | Commercial          | 1 |   |  |
| Performance | Clinical specificity      | Setting                                  | Intended Use        | 1 | 6 |  |
| Performance | Clinical specificity      | Does the patient have an infection?      | Diagnostic Question | 1 |   |  |
| Performance | Clinical specificity      | Are microorganisms present?              | Diagnostic Question | 1 |   |  |
| Performance | Clinical specificity      | Are there AMR determinants present?      | Diagnostic Question | 1 |   |  |
| Performance | Clinical specificity      | Which antimicrobial drug(s) can be used? | Diagnostic Question | 1 |   |  |
| Performance | Clinical specificity      | Regulatory                               | Commercial          | 1 |   |  |
| Performance | Positive predictive value | Setting                                  | Intended Use        | 1 | 6 |  |
| Performance | Positive predictive value | Does the patient have an infection?      | Diagnostic Question | 1 |   |  |
| Performance | Positive predictive value | Are microorganisms present?              | Diagnostic Question | 1 |   |  |
| Performance | Positive predictive value | Are there AMR determinants present?      | Diagnostic Question | 1 |   |  |

|             |                           |                                          |                     |   |    |    |
|-------------|---------------------------|------------------------------------------|---------------------|---|----|----|
| Performance | Positive predictive value | Which antimicrobial drug(s) can be used? | Diagnostic Question | 1 |    |    |
| Performance | Positive predictive value | Regulatory                               | Commercial          | 1 |    |    |
| Performance | Negative predictive value | Setting                                  | Intended Use        | 1 | 6  |    |
| Performance | Negative predictive value | Does the patient have an infection?      | Diagnostic Question | 1 |    |    |
| Performance | Negative predictive value | Are microorganisms present?              | Diagnostic Question | 1 |    |    |
| Performance | Negative predictive value | Are there AMR determinants present?      | Diagnostic Question | 1 |    |    |
| Performance | Negative predictive value | Which antimicrobial drug(s) can be used? | Diagnostic Question | 1 |    |    |
| Performance | Negative predictive value | Regulatory                               | Commercial          | 1 |    |    |
| Performance | Reproducibility           | Setting                                  | Intended Use        | 1 | 7  |    |
| Performance | Reproducibility           | End user                                 | Intended Use        | 1 |    |    |
| Performance | Reproducibility           | Does the patient have an infection?      | Diagnostic Question | 1 |    |    |
| Performance | Reproducibility           | Are microorganisms present?              | Diagnostic Question | 1 |    |    |
| Performance | Reproducibility           | Are there AMR determinants present?      | Diagnostic Question | 1 |    |    |
| Performance | Reproducibility           | Which antimicrobial drug(s) can be used? | Diagnostic Question | 1 |    |    |
| Performance | Reproducibility           | Regulatory                               | Commercial          | 1 |    |    |
| Commercial  | Regulatory                | Setting                                  | Intended Use        | 1 | 10 | 37 |
| Commercial  | Regulatory                | End user                                 | Intended Use        | 1 |    |    |
| Commercial  | Regulatory                | Does the patient have an infection?      | Diagnostic Question | 1 |    |    |
| Commercial  | Regulatory                | Are microorganisms present?              | Diagnostic Question | 1 |    |    |
| Commercial  | Regulatory                | Are there AMR determinants present?      | Diagnostic Question | 1 |    |    |
| Commercial  | Regulatory                | Which antimicrobial drug(s) can be used? | Diagnostic Question | 1 |    |    |

|            |                   |                                    |                  |   |    |  |
|------------|-------------------|------------------------------------|------------------|---|----|--|
| Commercial | Regulatory        | Test principle                     | Test Description | 1 |    |  |
| Commercial | Regulatory        | Test system                        | Test Description | 1 |    |  |
| Commercial | Regulatory        | Target analyte(s)                  | Test Description | 1 |    |  |
| Commercial | Regulatory        | Target specimen                    | Assay Protocol   | 1 |    |  |
| Commercial | Retail price      | Target population                  | Intended Use     | 1 | 15 |  |
| Commercial | Retail price      | Setting                            | Intended Use     | 1 |    |  |
| Commercial | Retail price      | End user                           | Intended Use     | 1 |    |  |
| Commercial | Retail price      | Test principle                     | Test Description | 1 |    |  |
| Commercial | Retail price      | Test system                        | Test Description | 1 |    |  |
| Commercial | Retail price      | Additional third-party consumables | Test Description | 1 |    |  |
| Commercial | Retail price      | Throughput                         | Test Description | 1 |    |  |
| Commercial | Retail price      | Random access                      | Test Description | 1 |    |  |
| Commercial | Retail price      | Instrument size                    | Test Description | 1 |    |  |
| Commercial | Retail price      | Power requirements                 | Test Description | 1 |    |  |
| Commercial | Retail price      | Instrument connectivity            | Test Description | 1 |    |  |
| Commercial | Retail price      | Result output                      | Test Description | 1 |    |  |
| Commercial | Retail price      | Data display                       | Test Description | 1 |    |  |
| Commercial | Retail price      | Shelf life                         | Test Description | 1 |    |  |
| Commercial | Retail price      | Bill of materials                  | Commercial       | 1 |    |  |
| Commercial | Bill of materials | Test principle                     | Test Description | 1 | 12 |  |
| Commercial | Bill of materials | Test system                        | Test Description | 1 |    |  |
| Commercial | Bill of materials | Additional third-party consumables | Test Description | 1 |    |  |
| Commercial | Bill of materials | Throughput                         | Test Description | 1 |    |  |
| Commercial | Bill of materials | Instrument size                    | Test Description | 1 |    |  |
| Commercial | Bill of materials | Power requirements                 | Test Description | 1 |    |  |
| Commercial | Bill of materials | Instrument connectivity            | Test Description | 1 |    |  |
| Commercial | Bill of materials | Result output                      | Test Description | 1 |    |  |
| Commercial | Bill of materials | Data display                       | Test Description | 1 |    |  |
| Commercial | Bill of materials | Shelf life                         | Test Description | 1 |    |  |
| Commercial | Bill of materials | Analytical sensitivity             | Performance      | 1 |    |  |
| Commercial | Bill of materials | Analytical specificity             | Performance      | 1 |    |  |
